# Supplementary material for: Epi-microRNA mediated metabolic reprogramming counteracts hypoxia to preserve affinity maturation
Source: PubMed Central journal article supplement (PMC11615350; doi:10.1038/s41467-024-54937-0), 2024-12-03
Supplement: 41467_2024_54937_MOESM2_ESM.pdf [file 41467_2024_54937_MOESM2_ESM.pdf]

## **Description of Additional Supplementary Files**

### **Supplementary Data 1. Identified cluster marker genes in scRNA-seq from total GC-B cells of WT and KO mice**

The two-sided, adjusted p-value was calculated using Bonferroni correction based on the total number of genes in the dataset. P values less than 0.05 are considered as significant.

### **Supplementary Data 2. Differentially expressed genes in bulk RNA-seq of WT and KO cMyc<sup>+</sup> LZ GC-B cells**

The two-sided, adjusted p-value was calculated using Bonferroni correction based on the total number of genes in the dataset. P values less than 0.05 are considered as significant.

### **Supplementary Data 3. Gene lists within the gene sets enriched in KO cMyc<sup>+</sup> LZ GC-B cells compared to WT cMyc<sup>+</sup> LZ GC-B cells**

### **Supplementary Data 4. H3K36me levels in the TSS regions of CpG genes: KO vs. WT**

### **Supplementary Data 5. Genes with “WT-enriched” and “KO-enriched” KDM2A peaks in activated B cells under hypoxia**
